# Supplementary material
Source: publisher figshare collection journal article supplement (https://acs.figshare.com/ndownloader/files/13130399)
Supplement: Supplementary file 1 [file 13130399]

## Supporting Information

### **The Synergistic Effect of F<sup>-</sup> Doping and LiF Coating on Improving the High-Voltage Cycling Stability and Rate Capacity of LiNi<sub>0.5</sub>Co<sub>0.2</sub>Mn<sub>0.3</sub>O<sub>2</sub> Cathode Materials for Lithium-Ion Batteries**

Kai Liu<sup>1</sup>, Qingqing Zhang<sup>1</sup>, Sheng Dai<sup>\*2,5</sup>, Wei Li<sup>1</sup>, Xingjiang Liu<sup>1,3</sup>, Fei Ding<sup>3</sup>, and Jinli Zhang<sup>\*1,4</sup>

<sup>1</sup> School of Chemical Engineering and Technology, Tianjin University, Tianjin 300350, P. R. China.

<sup>2</sup> Chemical Science Division, Oak Ridge National Laboratory, Oak Ridge, TN 37831, USA.

<sup>3</sup> National Key Laboratory of Science and Technology on Power Sources, Tianjin Institute of Power Sources, Tianjin 300384, P. R. China.

<sup>4</sup> School of Chemical Engineering, Shihezi University, Shihezi 832003, P. R. China.

<sup>5</sup> Department of Chemistry, University of Tennessee Knoxville, TN 37996, USA.

\*Corresponding author's email address: [dais@ornl.gov](mailto:dais@ornl.gov); [zhangjinli@tju.edu.cn](mailto:zhangjinli@tju.edu.cn)

## Supporting Figures

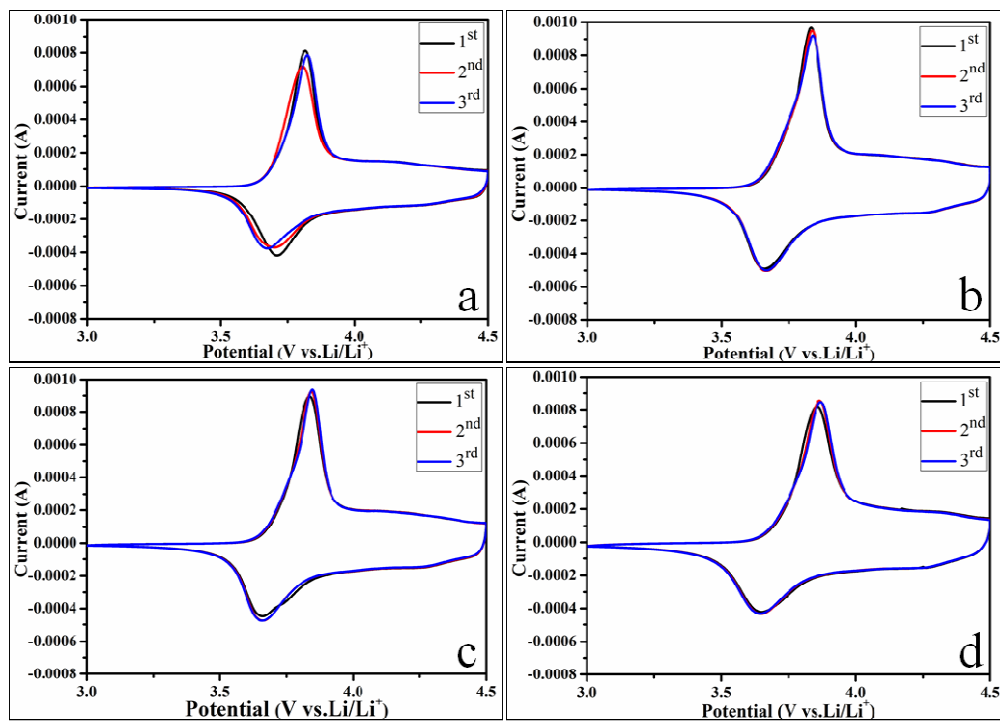

**Figure S1.** CV profiles of (a) LNCM, (b) LNCM-1, (c) LNCM-2, and (d) LNCM-3 at  $0.2 \text{ mV s}^{-1}$  at 3–4.5 V.

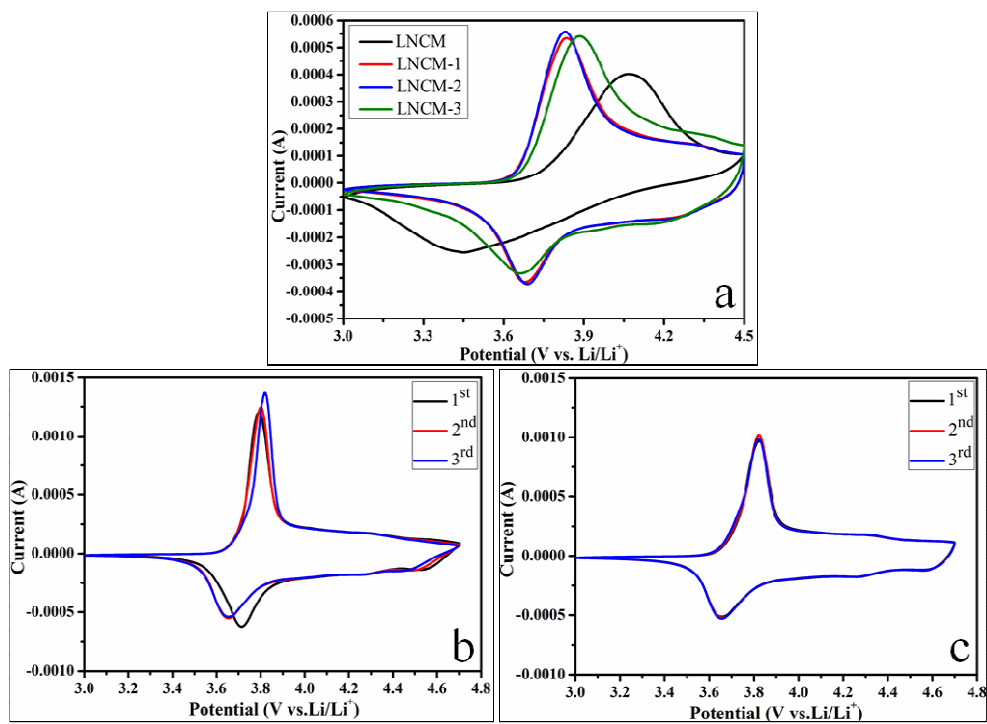

**Figure S2.** (a) CV curves of LNCM, LNCM-1, LNCM-2, and LNCM-3 at 0.2 mV s<sup>-1</sup> at 3-4.5 V after 100 cycles; CV profiles of (b) LNCM and (c) LNCM-2 for the first three cycles at 0.2 mV s<sup>-1</sup> at 3-4.7 V.

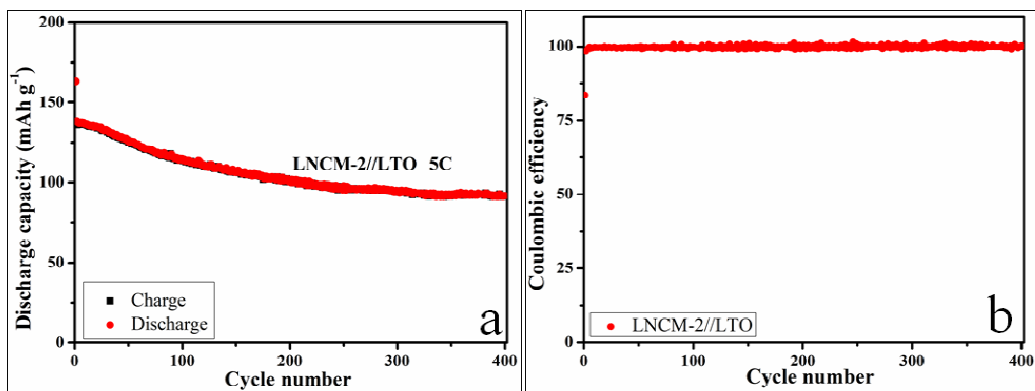

**Figure S3.** (a) Cycles performance and (b) Coulombic efficiency of full battery (LNCM-2//LTO) at 5 C between 1.2 and 3 V.

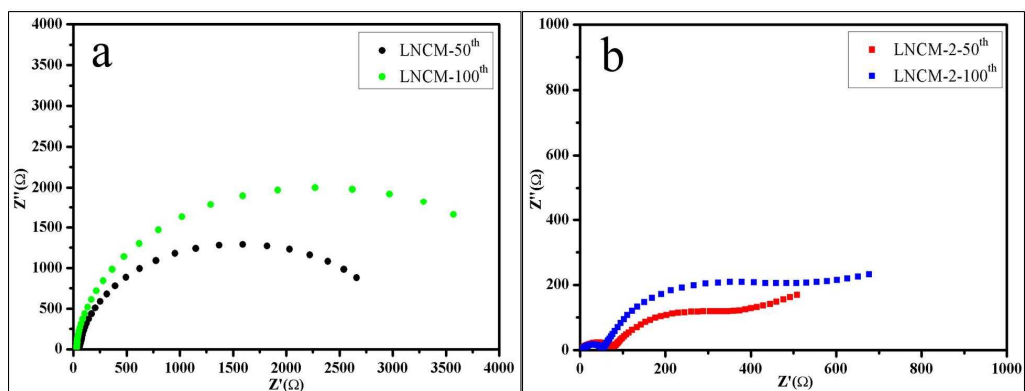

**Figure S4.** Nyquist plots of electrochemical impedance of (a) LNCM and (b) LNCM-2 measured at the fully discharged state, around 3 V, after 50<sup>th</sup> and 100<sup>th</sup> cycles.

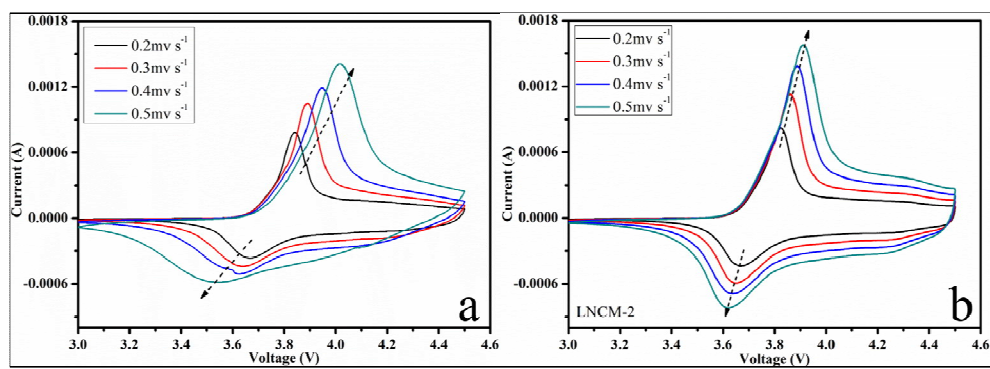

**Figure S5.** CV curves of (a) LNCM and (b) LNCM-2 at different sweep speeds from 0.2  $\text{mV s}^{-1}$  to 0.5  $\text{mV s}^{-1}$ .

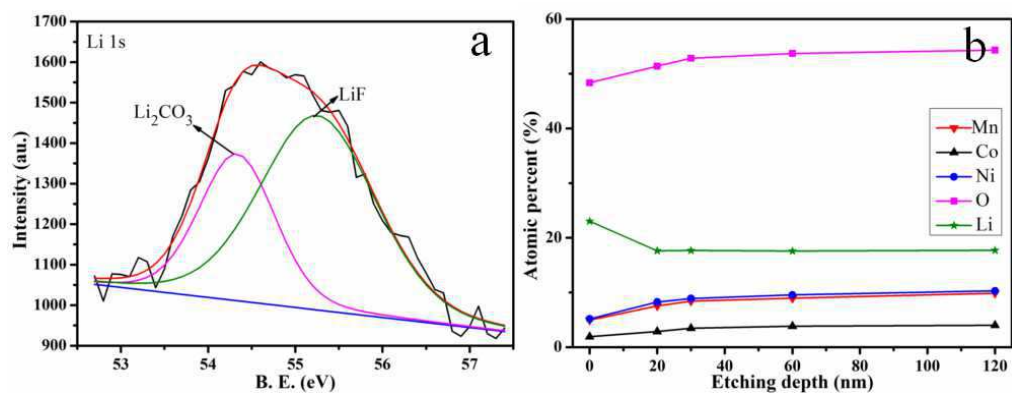

**Figure S6.** (a) Li 1s XPS spectra of LNCM-2; (b) Atomic percent of Li, Ni, Mn, Co, and O in XPS spectra of LNCM-2 with different etching depths.

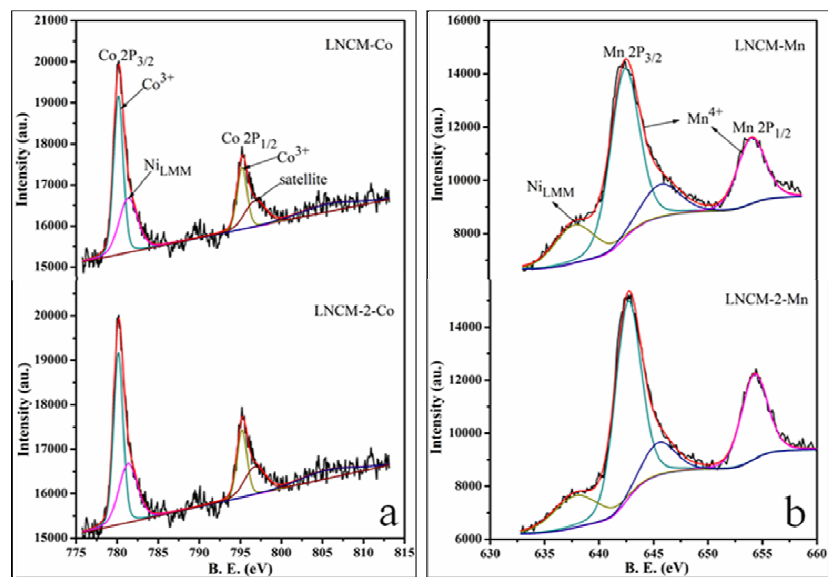

Figure S7. XPS survey spectra of (a) Co and (b) Mn.



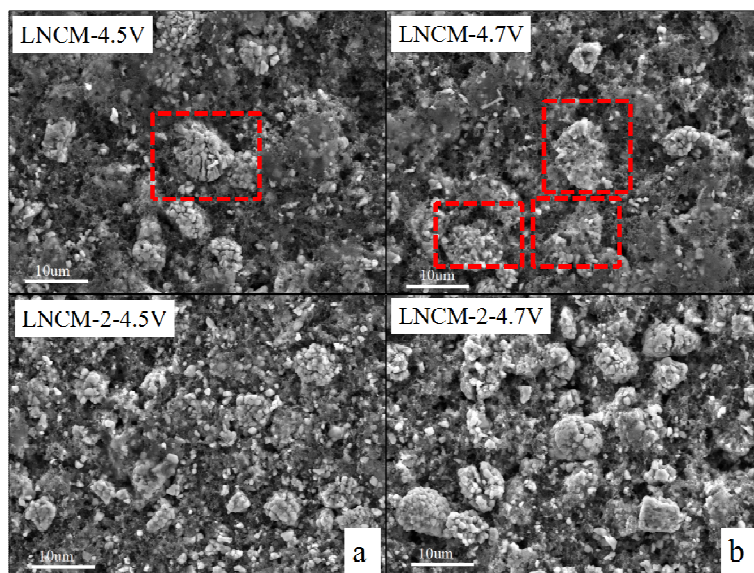

**Figure S8.** Original SEM images of LNCM and LNCM-2 after 100 cycles at 0.5 C at (a) 3-4.5 V; or (b) 3-4.7 V.

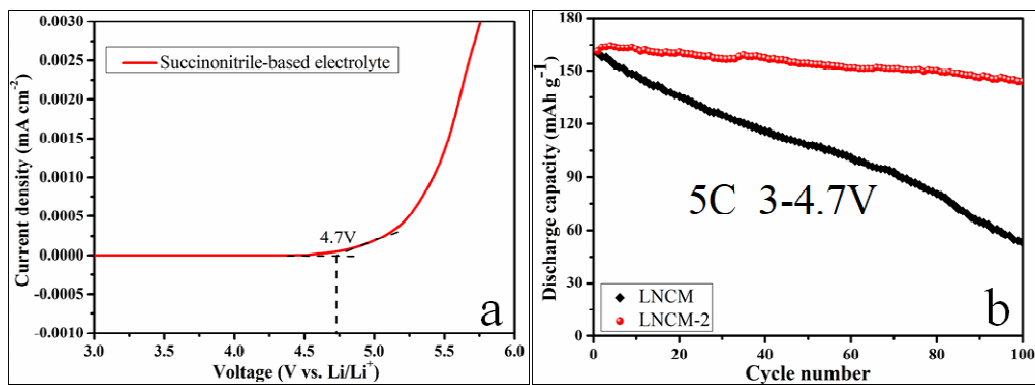

**Figure S9.** (a) Linear sweep curve of succinonitrile-based electrolyte at  $0.5 \text{ mV s}^{-1}$ ; (b) Cycles performance of LNCM and LNCM-2 at 5 C at 3-4.7 V vs. Li/Li<sup>+</sup>.

## Supporting Tables

**Table S1.**  $S_{\text{specific}}$  and  $V_{\text{pore}}$  of LNCM, LNCM-1, LNCM-2, and LNCM-3.

|        | $S_{\text{specific}}$ ( $\text{m}^2 \text{ g}^{-1}$ ) | $V_{\text{pore}}$ ( $\text{cm}^3 \text{ g}^{-1}$ ) |
|--------|-------------------------------------------------------|----------------------------------------------------|
| LNCM   | 18.624                                                | $1.764 \times 10^{-2}$                             |
| LNCM-1 | 29.263                                                | $2.268 \times 10^{-2}$                             |
| LNCM-2 | 42.008                                                | $3.48 \times 10^{-2}$                              |
| LNCM-3 | 30.687                                                | $2.566 \times 10^{-2}$                             |
